# Supplementary material for: Estimation of Motor Impairment and Usage of Upper Extremities during Daily Living Activities in Poststroke Hemiparesis Patients by Observation of Time Required to Accomplish Hand Dexterity Tasks
Source: Hindawi journal article supplement (doi:10.1155/2019/9471921), 2019-11-07
Supplement: f1 [file 9471921.f1.pdf]

**Table S1.** Mean times of the SHAP in the normative sample and derived from

participants in this study.

| Abstract Object Tasks |       | Normative data <sup>†</sup><br>(n = 24) | Hemiplegic data<br>(present study, n = 86) |         |
|-----------------------|-------|-----------------------------------------|--------------------------------------------|---------|
|                       |       | Time (s)                                | Time (s)                                   | IQR (s) |
| Spherical             | Light | 1.6                                     | 3.7                                        | 2.2–4.8 |
|                       | Heavy | 1.8                                     | 3.8                                        | 2.5–5.8 |
| Tripod                | Light | 1.7                                     | 3.8                                        | 2.5–5.5 |
|                       | Heavy | 1.6                                     | 3.9                                        | 2.6–6.5 |
| Power                 | Light | 1.8                                     | 3.5                                        | 2.3–5.3 |
|                       | Heavy | 1.8                                     | 3.6                                        | 2.6–5.8 |
| Lateral               | Light | 1.8                                     | 3.8                                        | 2.7–5.0 |
|                       | Heavy | 1.8                                     | 3.7                                        | 2.4–5.4 |
| Tip                   | Light | 1.6                                     | 3.9                                        | 2.5–5.2 |
|                       | Heavy | 1.6                                     | 3.9                                        | 2.6–5.4 |
| Extension             | Light | 1.8                                     | 3.4                                        | 2.3–5.3 |
|                       | Heavy | 1.7                                     | 3.5                                        | 2.4–5.4 |

SHAP: Southampton Hand Assessment Procedure, IQR: interquartile range.

<sup>†</sup>Light CM, Chappell PH, Kyberd PJ. Establishing a standardised clinical assessment tool for pathologic and prosthetic hand function: normative data, reliability and validity.

*Arch Phys Med Rehabil.* 2002; 83: 776-783.

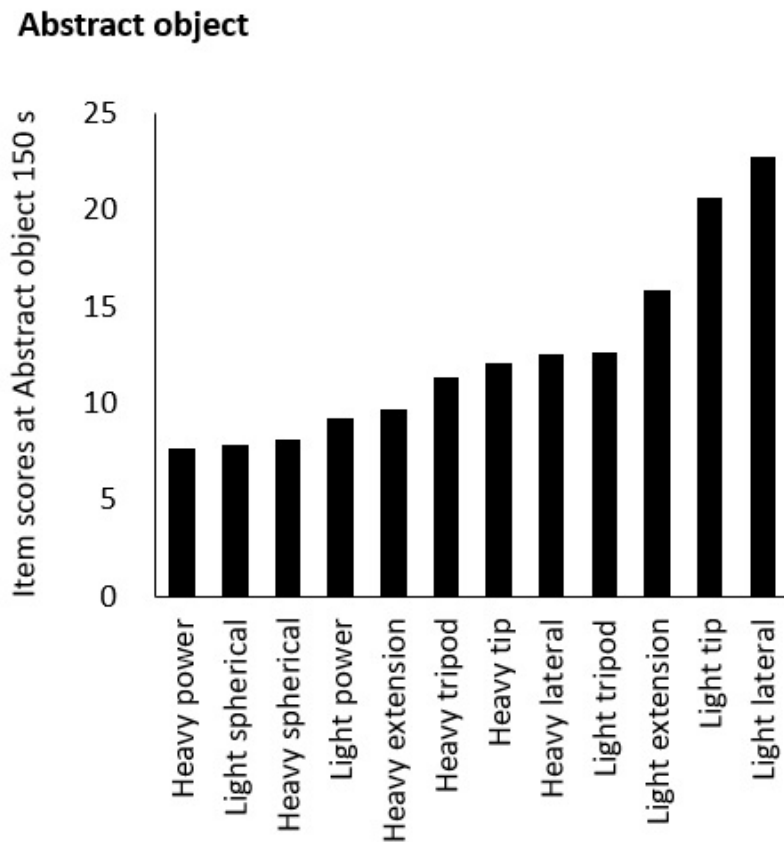

**Fig S1.** Values of the component items according to 150 seconds of the total of all SHAP items.

Values indicate the degree of difficulty for each component item. The Heavy Power item was the easiest item to perform and the Heavy Spherical was the most difficult item to perform in the Abstract Object Tasks test.

SHAP: Southampton Hand Assessment Procedure.
